# Supplementary material for: The Three-Dimensional Body Center of Mass at the Workplace under Hypogravity
Source: MDPI journal article supplement (doi:10.3390/bioengineering10101221), 2023-10-19
Supplement: s1 [file s1]

# The Three-Dimensional Body Center of Mass at the Workplace under Hypogravity

Tatiana Maillard

Space Innovation, Swiss Federal Institute of Technology Lausanne; tatiana.maillard@alumni.epfl.ch

## Supplementary Materials:

Figure S1: The 2020 Physical Activity Questionnaire (PAR-Q+) [32]

| GENERAL HEALTH QUESTIONS                                                                                                                                                                                                                                                                                                                                                |                          |                          |
|-------------------------------------------------------------------------------------------------------------------------------------------------------------------------------------------------------------------------------------------------------------------------------------------------------------------------------------------------------------------------|--------------------------|--------------------------|
| Please read the 7 questions below carefully and answer each one honestly: check YES or NO.                                                                                                                                                                                                                                                                              | YES                      | NO                       |
| 1) Has your doctor ever said that you have a heart condition <input type="checkbox"/> OR high blood pressure <input type="checkbox"/> ?                                                                                                                                                                                                                                 | <input type="checkbox"/> | <input type="checkbox"/> |
| 2) Do you feel pain in your chest at rest, during your daily activities of living, OR when you do physical activity?                                                                                                                                                                                                                                                    | <input type="checkbox"/> | <input type="checkbox"/> |
| 3) Do you lose balance because of dizziness OR have you lost consciousness in the last 12 months?<br>Please answer NO if your dizziness was associated with over-breathing (including during vigorous exercise).                                                                                                                                                        | <input type="checkbox"/> | <input type="checkbox"/> |
| 4) Have you ever been diagnosed with another chronic medical condition (other than heart disease or high blood pressure)? PLEASE LIST CONDITION(S) HERE: _____                                                                                                                                                                                                          | <input type="checkbox"/> | <input type="checkbox"/> |
| 5) Are you currently taking prescribed medications for a chronic medical condition?<br>PLEASE LIST CONDITION(S) AND MEDICATIONS HERE: _____                                                                                                                                                                                                                             | <input type="checkbox"/> | <input type="checkbox"/> |
| 6) Do you currently have (or have had within the past 12 months) a bone, joint, or soft tissue (muscle, ligament, or tendon) problem that could be made worse by becoming more physically active? Please answer NO if you had a problem in the past, but it <b>does not limit your current ability</b> to be physically active.<br>PLEASE LIST CONDITION(S) HERE: _____ | <input type="checkbox"/> | <input type="checkbox"/> |
| 7) Has your doctor ever said that you should only do medically supervised physical activity?                                                                                                                                                                                                                                                                            | <input type="checkbox"/> | <input type="checkbox"/> |

Table S1: G\*Power sample size analysis results. F tests – ANOVA: repeated measures, within-between interaction. A significance level of  $\alpha = .05$  was established.

| Input                               |            |
|-------------------------------------|------------|
| Effect size f                       | 0.25       |
| $\alpha$ error prob                 | 0.05       |
| Power (1- $\beta$ error prob)       | 0.8        |
| Number of groups                    | 2          |
| Number of measurements              | 3          |
| Correlation among repeated measures | 0.8        |
| Nonsphericity correction e          | 1          |
| Output                              |            |
| Noncentrality parameter $\lambda$   | 11.2500000 |
| Critical F                          | 3.4928285  |
| Numerator df                        | 2.0000000  |
| Denominator df                      | 20.0000000 |
| Total sample size <sup>1</sup>      | 12         |
| Actual power                        | 0.8005308  |

<sup>1</sup> The specified benchmarks, as outlined in [47], were 0.2 (indicating a small effect), 0.5 (representing a moderate effect), and 0.8 (indicating a large effect) between the experimental groups. When examining the impact of environmental factors on postural variables during tasks, a minimum of twelve participants is necessary to achieve an actual power of 0.80.

Table S2. Shapiro-Wilk normality test results for females/males for center of mass (CoM) study experiment. W-test statistic

| Task                         | W         | p-value   |
|------------------------------|-----------|-----------|
| CoM -Y axis - Pelvic -1 g    | 0.96/0.88 | 0.46/0.01 |
| CoM -Y axis - Pelvic - 1/6 g | 0.85/0.95 | 0.01/0.03 |
| CoM - Z axis - Pelvic -1 g   | 0.92/0.72 | 0.09/0.01 |
| CoM -Z axis - Pelvic - 1/6 g | 0.80/0.95 | 0.01/0.07 |

Table S3. The mean CoM coordinates along the anterior-posterior (Z) axis/pelvis for males and females together (cm). Gravity level (G-level) means gravity change from 1/6 g to 1 g. \*\*\*p<0.1; \*\*p<0.05. The standard error in the calculations is also shown by the indicator between the brackets. Constant – the correlation that cannot be explained by the explanatory variables: g-level and task. This is common for all the observations. Adapted from [3].

| Variable                | CoM - anterior-posterior (Z) axis/pelvis |                 |
|-------------------------|------------------------------------------|-----------------|
|                         | Static                                   | Dynamic         |
| G-level                 | 2.71 (2.00)                              | -0.74 (1.14)    |
| Gender                  | -4.43** (2.08)                           | -7.23*** (1.24) |
| Constant <sup>1</sup>   | 0.65 (1.38)                              | 3.91*** (0.93)  |
| Observations            | 84                                       | 86              |
| R <sup>2</sup>          | 0.08                                     | 0.29            |
| Adjusted R <sup>2</sup> | 0.06                                     | 0.27            |
| Residual Std. Error     | 9.08                                     | 5.26            |
| F Statistic             | 3.50**                                   | 17.04***        |

Table S4. The mean CoM coordinates along the proximodistal (Y) axis/pelvis for males and females together (cm). Gravity level (G-level) means gravity change from 1/6 g to 1 g. \*\*\*p<0.1. The standard error in the calculations is also shown by the indicator between the brackets. Constant – the correlation that cannot be explained by the explanatory variables: g-level and task. This is common for all the observations. Adapted from [3].

| Variable                | CoM - proximodistal (Y)/ pelvis |                 |
|-------------------------|---------------------------------|-----------------|
|                         | Static                          | Dynamic         |
| G-level                 | 11.13*** (1.74)                 | 15.71*** (1.51) |
| Gender                  | 4.99*** (1.81)                  | 9.33*** (1.64)  |
| Constant <sup>1</sup>   | -2.34 (1.38)                    | -7.80*** (1.17) |
| Observations            | 84                              | 86              |
| R <sup>2</sup>          | 0.36                            | 0.62            |
| Adjusted R <sup>2</sup> | 0.34                            | 0.61            |
| Residual Std. Error     | 7.90                            | 6.97            |
| F Statistic             | 22.83***                        | 66.48***        |
